## CORRECTION

# Volume regulation and shape bifurcation in the cell nucleus

Dong-Hwee Kim<sup>1,2,3,4,\*</sup>, Bo Li<sup>1,5,\*</sup>, Fangwei Si<sup>1,5</sup>, Jude M. Phillip<sup>1,2</sup>, Denis Wirtz<sup>1,2,‡</sup> and Sean X. Sun<sup>1,5,‡</sup>

There was an error published in *J. Cell Sci.* **128**, 3375-3385.

An institute affiliation was omitted for the first author, Dong-Hwee Kim. The correct author affiliations are given below.

<sup>1</sup>Johns Hopkins Physical Sciences-Oncology Center, Johns Hopkins University, Baltimore, MD 21218, USA. <sup>2</sup>Department of Chemical and Biomolecular Engineering, Johns Hopkins University, Baltimore, MD 21218, USA. <sup>3</sup>Disease Biophysics Group, Wyss Institute for Biologically Inspired Engineering, School of Engineering and Applied Sciences, Harvard University, Cambridge, MA 02138, USA. <sup>4</sup>KU-KIST Graduate School of Converging Science and Technology, Korea University, Seoul, 02841, Republic of Korea. <sup>5</sup>Department of Mechanical Engineering, Johns Hopkins University, Baltimore, MD 21218, USA.

\*These authors contributed equally to this work

‡Authors for correspondence (wirtz@jhu.edu; ssun@jhu.edu)

The authors apologise to the readers for any confusion that this error might have caused.
